# Supplementary material
Source: PubMed Central journal article supplement (PMC4019670)
Supplement: NIHMS577809-supplement-01.pdf [file NIHMS577809-supplement-01.pdf]

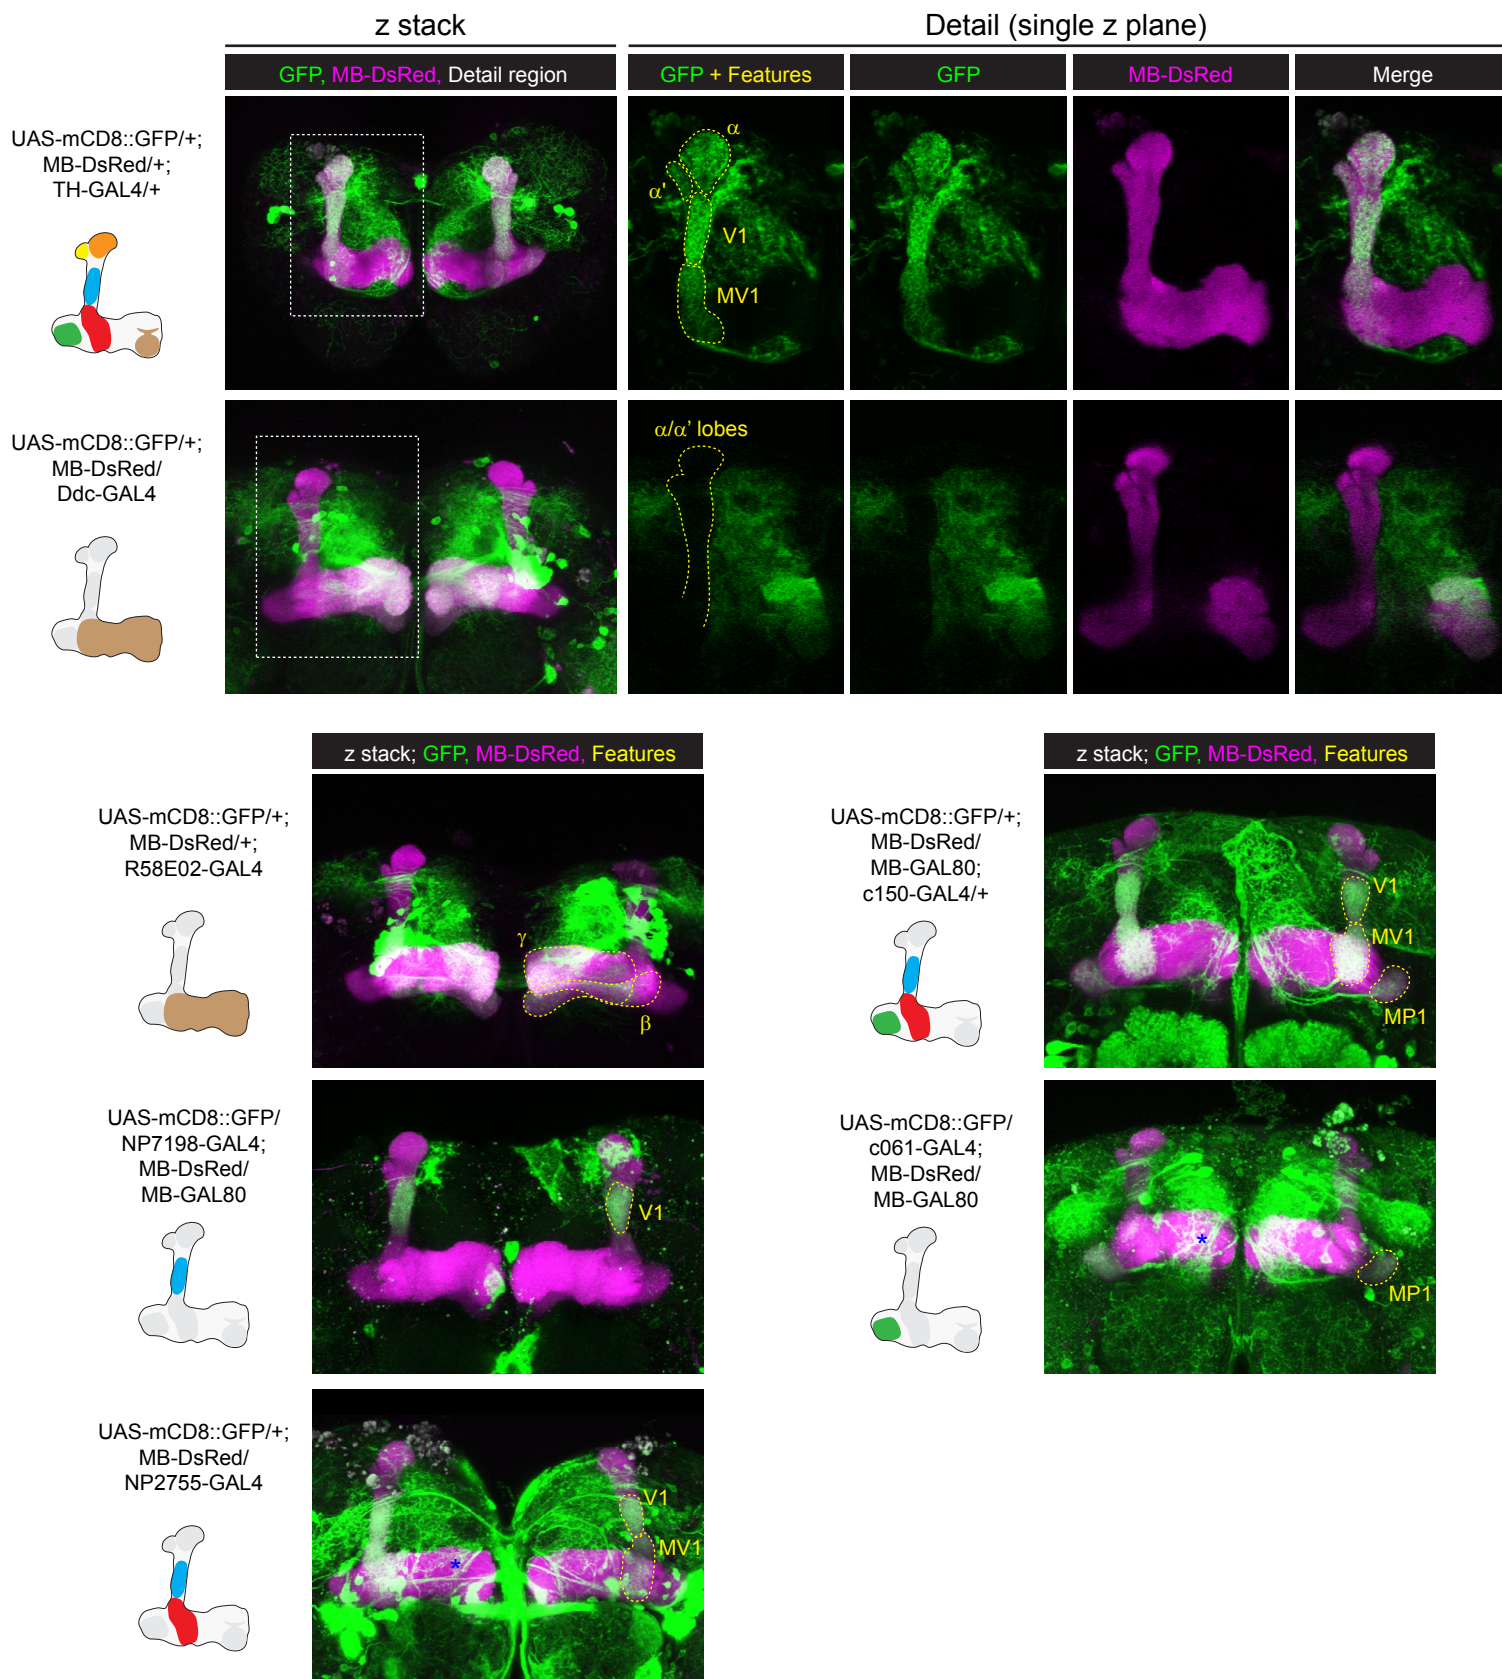

**Figure S1**, related to Figure 3. **Expression patterns of the GAL4 drivers used in this study.** In the top two rows, the left panel is a maximum intensity z projection, with the right panels showing a single z plane to highlight features of the MB innervation of the driver. The bottom three rows are z projections, with the MB innervation indicated by the dashed yellow outline. Blue asterisks indicate non-overlapping expression in different z planes.

$\beta / \gamma$  lobes, heel (hl) $\alpha$  tip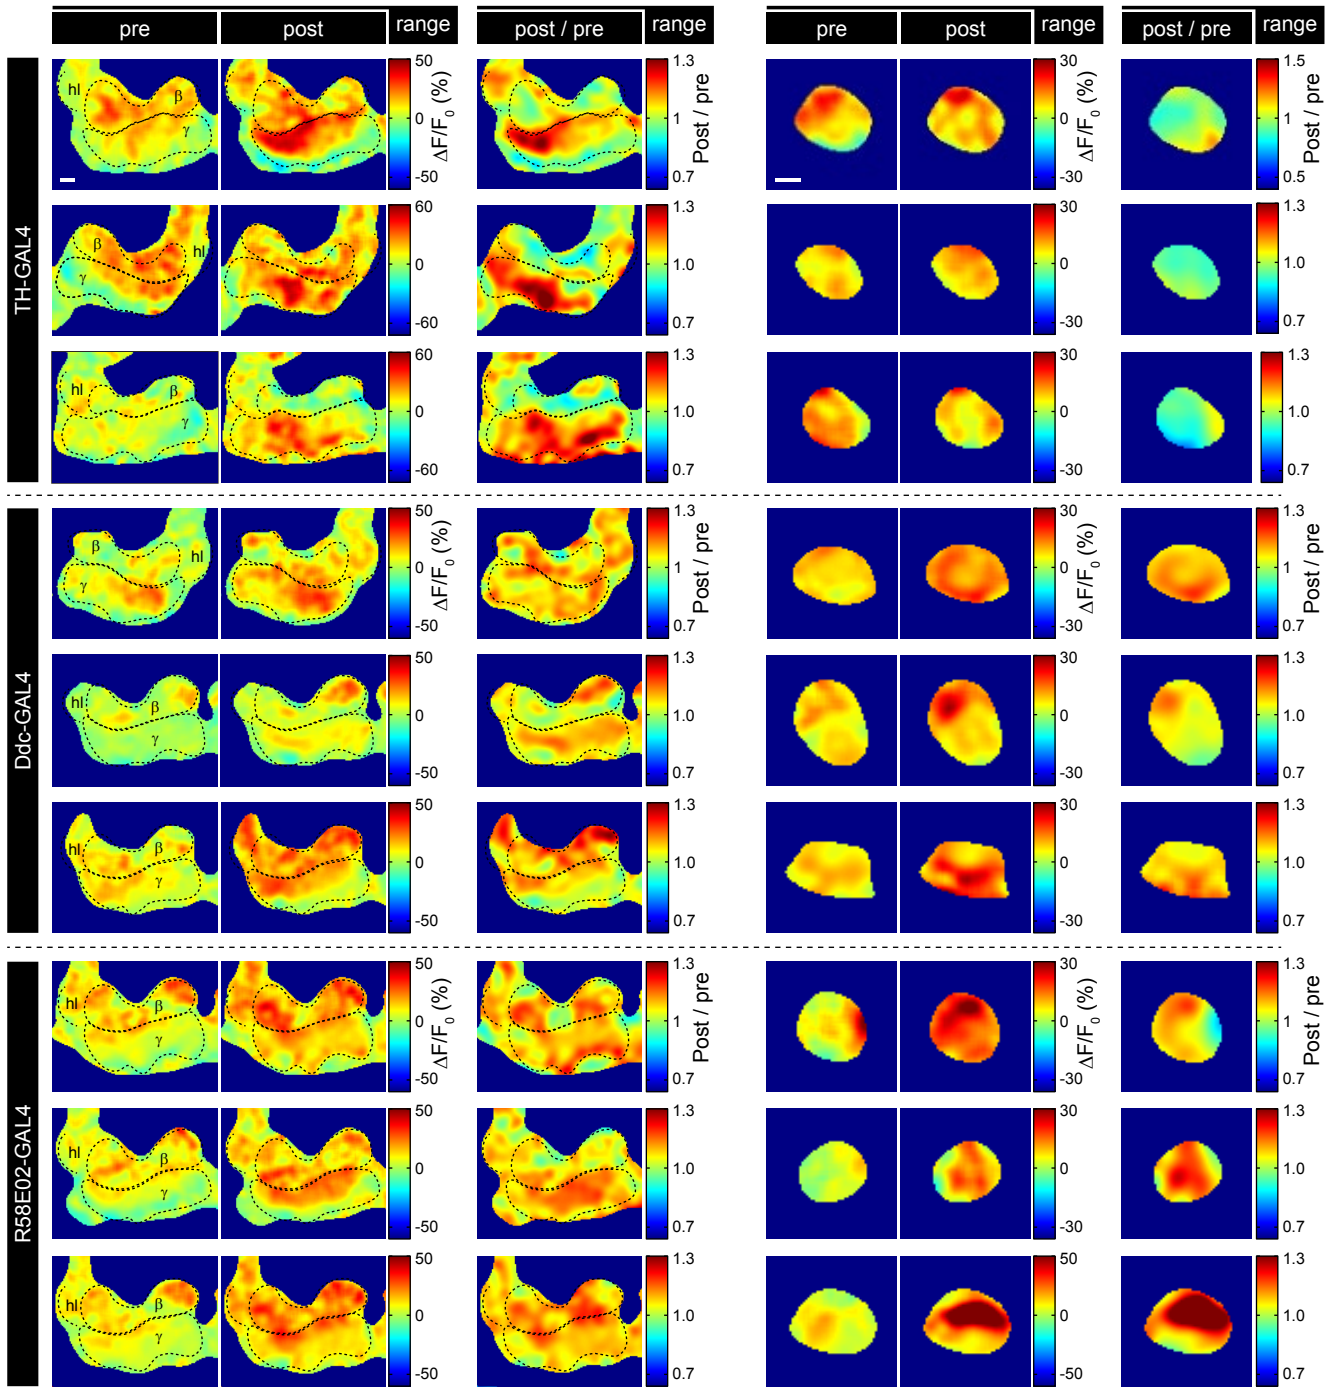

**Figure S2**, related to Figure 4. **Comparison of odor responses pre- and post-conditioning with different GAL4 drivers in representative flies.** Pseudocolored images showing the response magnitude (MB-GCaMP3  $\Delta F/F_0$ ) before and after conditioning, as well as the change in response following conditioning (post/pre response) using three GAL4 lines to drive TRPA1. Regions of the  $\beta/\gamma$  lobes and heel (hl) corresponding to the quantified regions of interest were outlined by following the edges of the GCaMP fluorescence in the raw images (Fig. 4). The  $\gamma$  lobe was differentiated from  $\beta$  by its higher basal fluorescence. Each set of images is from a different animal. Note the lack of calcium response plasticity in the  $\alpha/\beta$  lobes in the TH-GAL4 flies. Scale bars = 20  $\mu$ m.

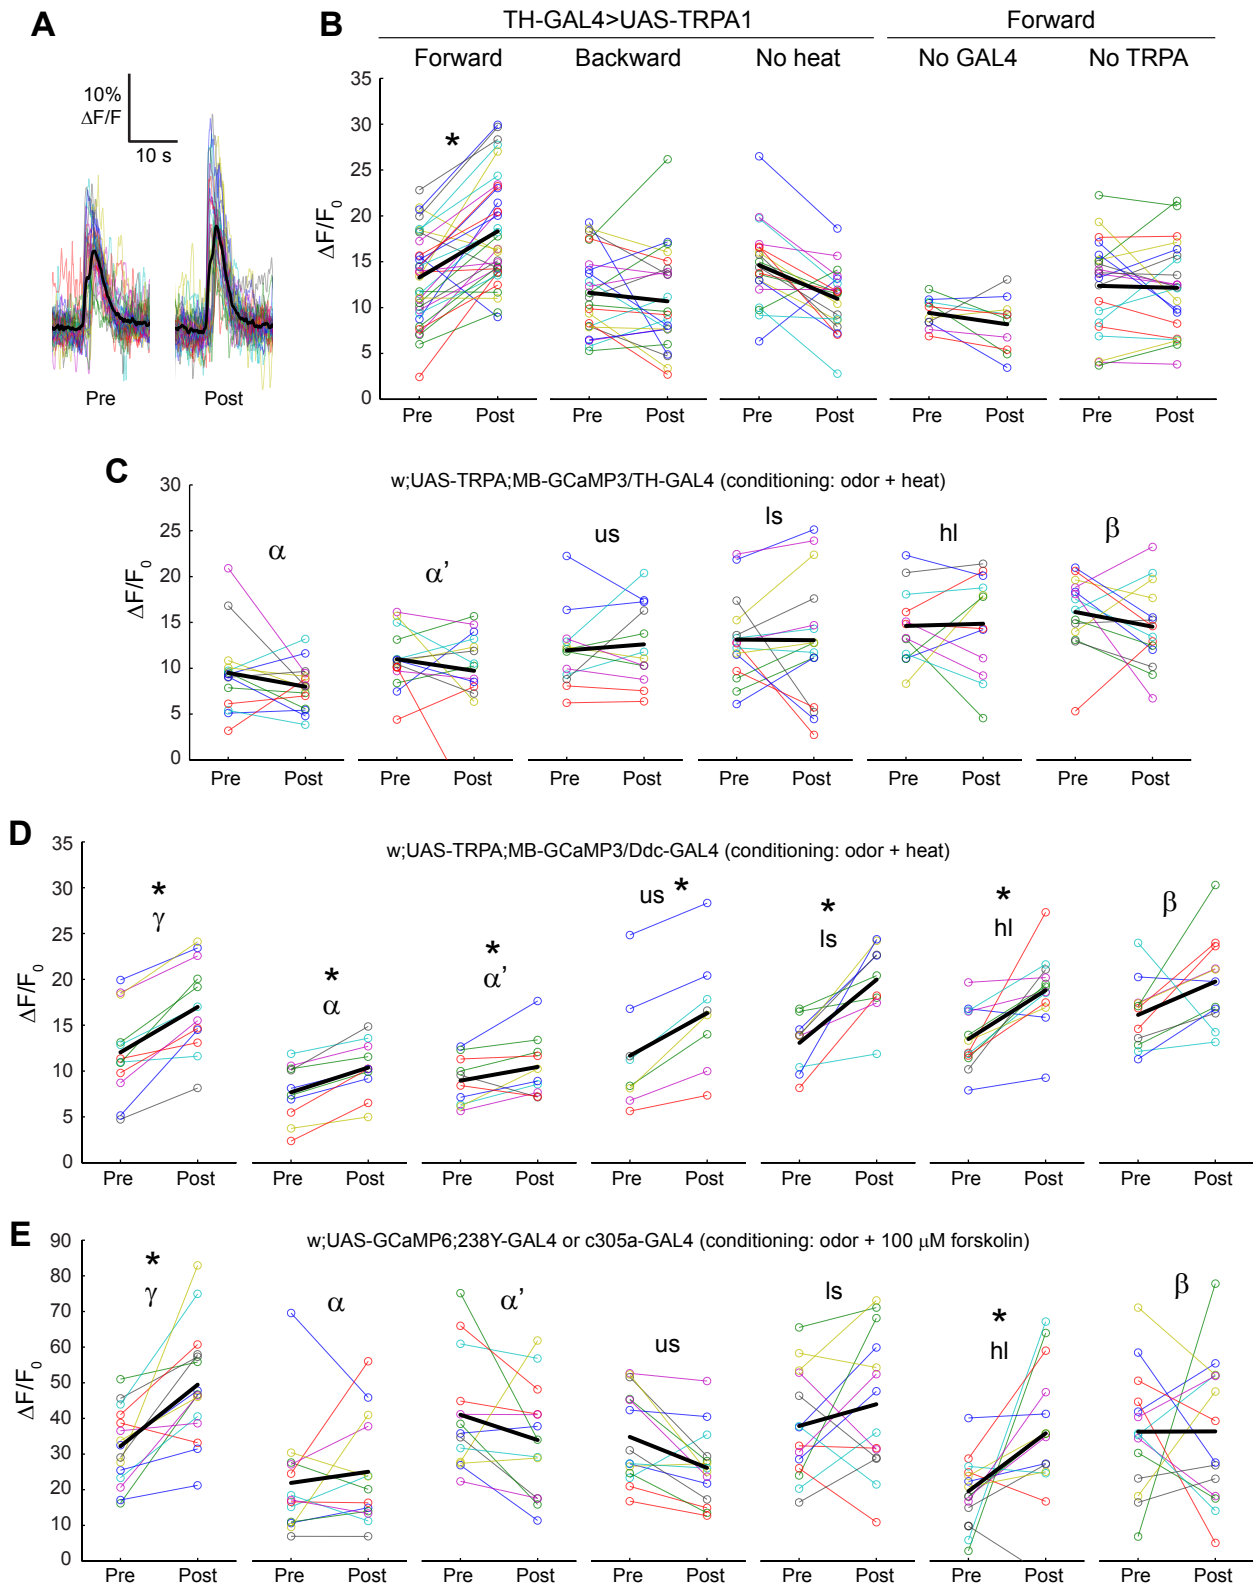

**Figure S3**, related to Figure 5. **Raw data from  $Ca^{2+}$  imaging experiments.** A. Raw odor responses before (Pre) and after (Post) conditioning (TH-GAL4, forward,  $\gamma$ ). B. Peak odor response magnitudes for TH-GAL4 experiments involving forward and backward pairing, along with controls. C-D. Odor response magnitudes pre- and post-training across MB regions for TH- and Ddc-GAL4. E. Odor response magnitudes pre- and post-forskolin application (100  $\mu$ M) across MB regions. All regions were imaged in 238Y-GAL4>UAS-GCaMP6 flies, except  $\alpha'$ , which was recorded in c305a-GAL4>UAS-GCaMP6 flies. us: upper stalk, ls: lower stalk, hl: heel. \* $p < 0.05$  (Wilcoxon signed-rank tests).

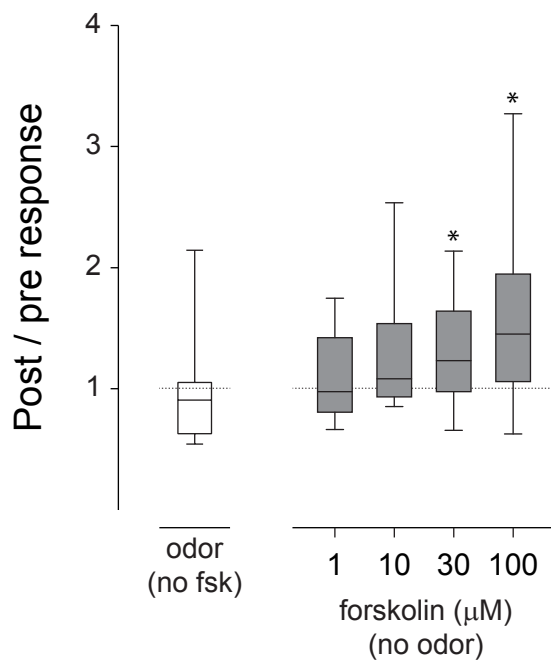

**Figure S4**, related to Figure 6. **Calcium response changes in the  $\gamma$  lobe following unpaired presentation of odor or forskolin.** There was no significant change in odor response magnitudes following a 30-s odor presentation with no forskolin (white bar, left). Adding forskolin in the bath for 30-s with no odor presentation produced a significant increase in the post-washout odor response at 30  $\mu$ M and 100  $\mu$ M (Wilcoxon signed-rank tests; \* $p < 0.05$ ).
